# Supplementary material for: Circular RNA ROCK1, a novel circRNA, suppresses osteosarcoma proliferation and migration via altering the miR-532-5p/PTEN axis
Source: PubMed Central journal article supplement (PMC9356001; doi:10.1038/s12276-022-00806-z), 2022-07-25
Supplement: 12276_2022_806_MOESM1_ESM.pdf [file 12276_2022_806_MOESM1_ESM.pdf]

## **Supplementary Materials**

**Circular RNA ROCK1, a novel circRNA, suppresses osteosarcoma proliferation and migration via altering the miR-532-5p/PTEN axis**

Yize Liu<sup>1,2</sup>, Guanzhen Qiu<sup>2</sup>, Yinzhou Luo<sup>2</sup>, Shanshan Li<sup>3</sup>, Yeqiu Xu<sup>2</sup>, Yuanzhuang Zhang<sup>2</sup>, Jiayuan Hu<sup>4</sup>, Peifeng Li<sup>5</sup>, Hai Pan<sup>6</sup>, Yong Wang<sup>1,2,7\*</sup>

# Supplementary Figures

Supplementary Fig.1

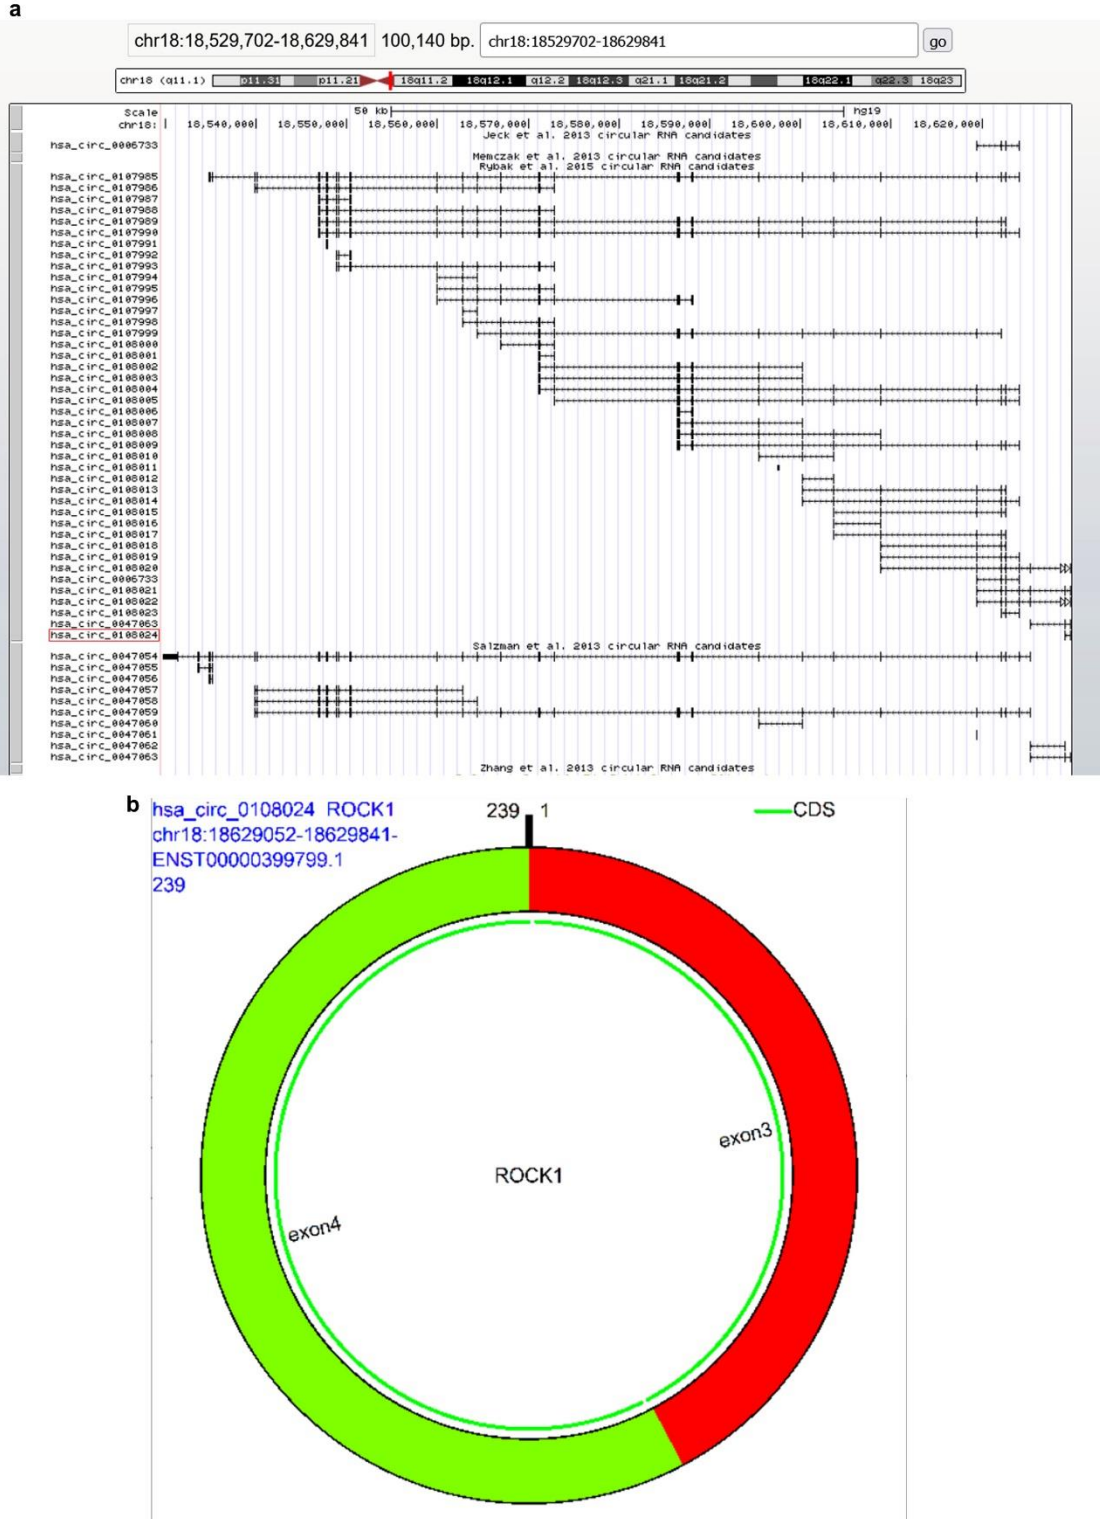

Supplementary Fig.1 (a) CircRNAs that might be derived from ROCK1 gene, as illustrated in UCSC Genome Browser. (b) CircROCK1-E3/E4 (hsa\_circ\_0108024) is

back-spliced from exon 3 and exon 4 of ROCK1 gene as indicated by circPrimer.

Supplementary Fig.2

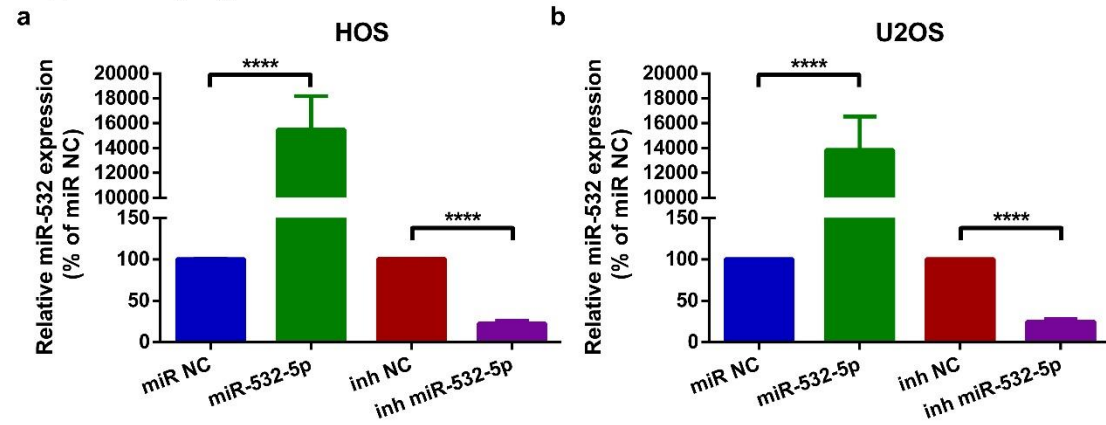

**Supplementary Fig.2** (a-b) The expression of miR-532-5p after transfection of miR-532-5p mimics or inhibitors in HOS and U2OS cells were confirmed by a RT-qPCR assays. \*\*\*\*  $p < 0.0001$ . All data are presented as the mean  $\pm$  SD from three independent experiments.

Supplementary Fig.3

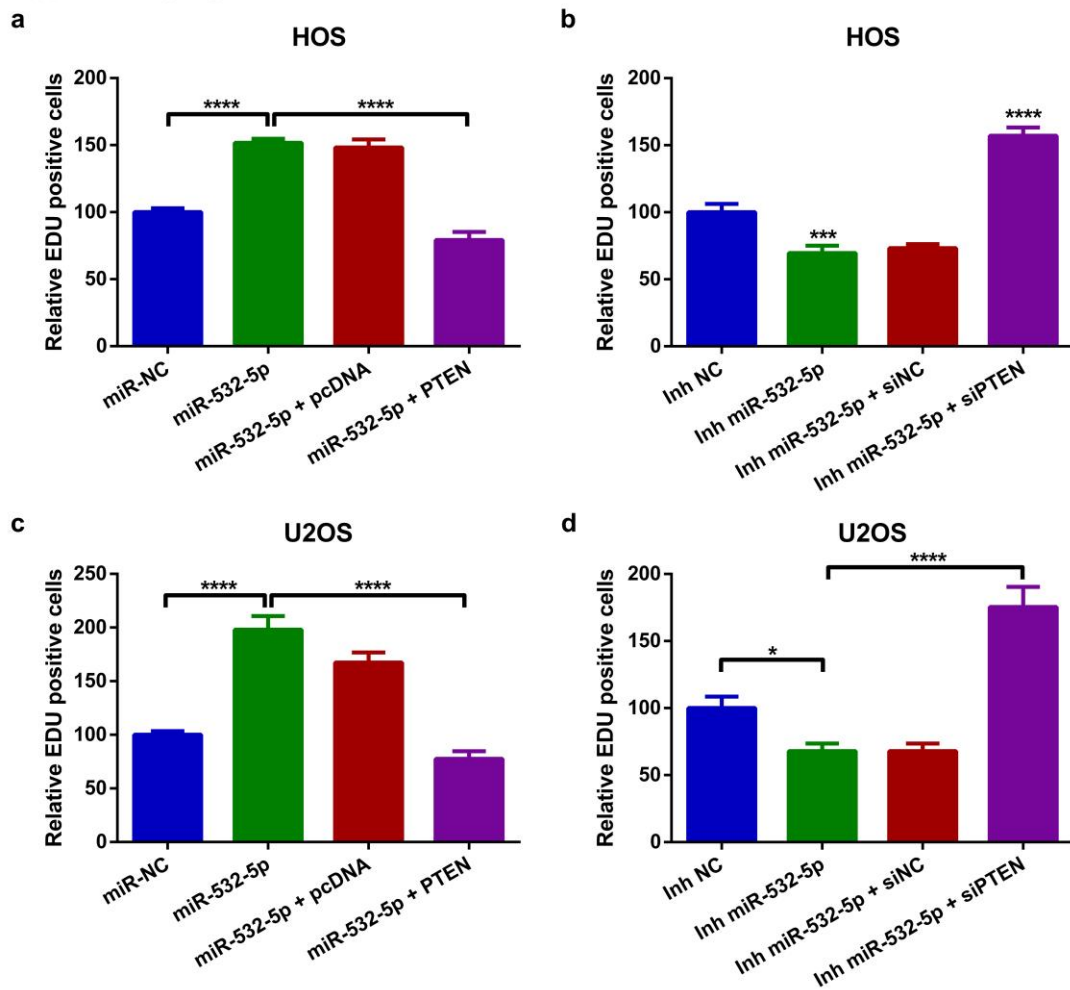

**Supplementary Fig.3** (a-d) The cell proliferation ability changes of HOS (a and b) and U2OS (c and d) cells after transfection of diverse miR-532-5p oligonucleotides or specific PTEN siRNAs were qualified by an EDU assay. \*\*\*\*  $p < 0.0001$ . All data are presented as the mean  $\pm$  SD from three independent experiments.

Supplementary Fig.4

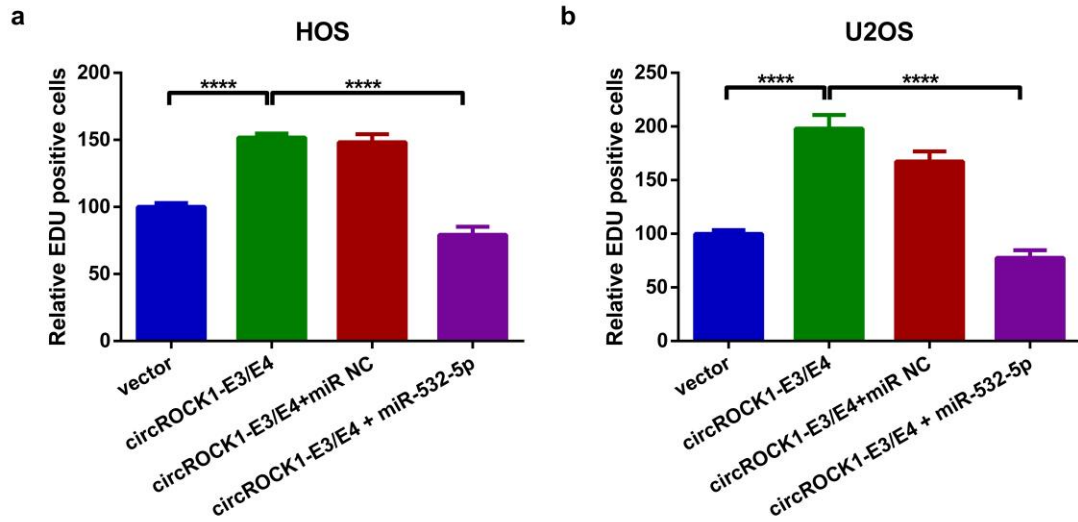

**Supplementary Fig.4** (a-b) The cell proliferation ability changes of HOS and U2OS cells after different circROCK1-E3/E4 or miR-532-5p intervene were determined by an EDU assay. \*\*\*\*  $p < 0.0001$ . All data are presented as the mean  $\pm$  SD from three independent experiments.

## Supplementary Tables

**Supplementary Table 1. CircRNAs derived from human ROCK1 gene**

| <b>Position</b>         | <b>CircRNA ID</b> | <b>Genomic length</b> | <b>Spliced length</b> | <b>Best transcript</b> | <b>Gene symbol</b> | <b>CircRNA study</b> |
|-------------------------|-------------------|-----------------------|-----------------------|------------------------|--------------------|----------------------|
| chr18:18619432-18619524 | hsa_circ_0047061  | 92                    | 92                    | NM_005406              | ROCK1              | Salzman2013          |
| chr18:18595391-18600200 | hsa_circ_0047060  | 4809                  | 138                   | NM_005406              | ROCK1              | Salzman2013          |
| chr18:18600111-18603641 | hsa_circ_0108012  | 3530                  | 150                   | ENST00000399799.1      | ROCK1              | Rybak2015            |
| chr18:18547712-18547901 | hsa_circ_0107991  | 189                   | 189                   | ENST00000399799.1      | ROCK1              | Rybak2015            |
| chr18:18595391-18603641 | hsa_circ_0108010  | 8250                  | 199                   | ENST00000399799.1      | ROCK1              | Rybak2015            |
| chr18:18597458-18597673 | hsa_circ_0108011  | 215                   | 215                   | ENST00000399799.1      | ROCK1              | Rybak2015            |
| chr18:18603580-18608896 | hsa_circ_0108016  | 5316                  | 221                   | ENST00000399799.1      | ROCK1              | Rybak2015            |
| chr18:18629052-18629841 | hsa_circ_0108024  | 789                   | 239                   | ENST00000399799.1      | ROCK1              | Rybak2015            |
| chr18:18562723-18564496 | hsa_circ_0141375  | 1773                  | 255                   | ENST00000399799.1      | ROCK1              | Maass2017            |
| chr18:18562723-18564496 | hsa_circ_0107997  | 1773                  | 255                   | ENST00000399799.1      | ROCK1              | Rybak2015            |
| chr18:18571136-18572898 | hsa_circ_0108001  | 1762                  | 258                   | ENST00000399799.1      | ROCK1              | Rybak2015            |

|                         |                  |       |     |                   |       |                                |
|-------------------------|------------------|-------|-----|-------------------|-------|--------------------------------|
| chr18:18625252-18629190 | hsa_circ_0047062 | 3938  | 314 | NM_005406         | ROCK1 | Salzman2013                    |
| chr18:18534743-18535206 | hsa_circ_0047056 | 463   | 341 | NM_005406         | ROCK1 | Salzman2013                    |
| chr18:18548732-18550474 | hsa_circ_0107992 | 1742  | 349 | ENST00000399799.1 | ROCK1 | Rybak2015                      |
| chr18:18559870-18564496 | hsa_circ_0107994 | 4626  | 350 | ENST00000399799.1 | ROCK1 | Rybak2015                      |
| chr18:18622057-18624147 | hsa_circ_0108023 | 2090  | 369 | ENST00000399799.1 | ROCK1 | Rybak2015                      |
| chr18:18625252-18629841 | hsa_circ_0047063 | 4589  | 415 | NM_005406         | ROCK1 | Rybak2015, Salzman2013         |
| chr18:18566910-18572898 | hsa_circ_0108000 | 5988  | 419 | ENST00000399799.1 | ROCK1 | Rybak2015                      |
| chr18:18619432-18624147 | hsa_circ_0006733 | 4715  | 461 | NM_005406         | ROCK1 | Jeck2013, Maass2017, Rybak2015 |
| chr18:18586311-18588155 | hsa_circ_0108006 | 1844  | 475 | ENST00000399799.1 | ROCK1 | Rybak2015                      |
| chr18:18608736-18622670 | hsa_circ_0108018 | 13934 | 536 | ENST00000399799.1 | ROCK1 | Rybak2015                      |
| chr18:18533538-18535206 | hsa_circ_0047055 | 1668  | 549 | NM_005406         | ROCK1 | Salzman2013                    |
| chr18:18603576-18622666 | hsa_circ_0108015 | 19090 | 597 | ENST00000399799.1 | ROCK1 | Rybak2015                      |
| chr18:18603580-18622670 | hsa_circ_0108017 | 19090 | 597 | ENST00000399799.1 | ROCK1 | Rybak2015                      |
| chr18:18586311-18600200 | hsa_circ_0108007 | 13889 | 613 | ENST00000399799.1 | ROCK1 | Rybak2015                      |

|                         |                  |       |      |                   |       |             |
|-------------------------|------------------|-------|------|-------------------|-------|-------------|
| chr18:18608736-18624147 | hsa_circ_0108019 | 15411 | 621  | ENST00000399799.1 | ROCK1 | Rybak2015   |
| chr18:18562723-18572898 | hsa_circ_0107998 | 10175 | 674  | ENST00000399799.1 | ROCK1 | Rybak2015   |
| chr18:18600111-18622670 | hsa_circ_0108013 | 22559 | 686  | ENST00000399799.1 | ROCK1 | Rybak2015   |
| chr18:18546877-18550474 | hsa_circ_0107987 | 3597  | 698  | ENST00000399799.1 | ROCK1 | Rybak2015   |
| chr18:18559870-18572898 | hsa_circ_0107995 | 13028 | 769  | ENST00000399799.1 | ROCK1 | Rybak2015   |
| chr18:18559870-18572898 | hsa_circ_0141374 | 13028 | 769  | ENST00000399799.1 | ROCK1 | Maass2017   |
| chr18:18600111-18624147 | hsa_circ_0108014 | 24036 | 771  | ENST00000399799.1 | ROCK1 | Rybak2015   |
| chr18:18586311-18608896 | hsa_circ_0108008 | 22585 | 834  | ENST00000399799.1 | ROCK1 | Rybak2015   |
| chr18:18571136-18600197 | hsa_circ_0108002 | 29061 | 868  | ENST00000399799.1 | ROCK1 | Rybak2015   |
| chr18:18571136-18600200 | hsa_circ_0108003 | 29064 | 871  | ENST00000399799.1 | ROCK1 | Rybak2015   |
| chr18:18619432-18629841 | hsa_circ_0108021 | 10409 | 876  | ENST00000399799.1 | ROCK1 | Rybak2015   |
| chr18:18619432-18650574 | hsa_circ_0108022 | 31142 | 958  | ENST00000399799.1 | ROCK1 | Rybak2015   |
| chr18:18539800-18562793 | hsa_circ_0047057 | 22993 | 1023 | NM_005406         | ROCK1 | Salzman2013 |
| chr18:18608736-18650574 | hsa_circ_0108020 | 41838 | 1118 | ENST00000399799.1 | ROCK1 | Rybak2015   |



|                         |                  |       |      |                   |       |             |
|-------------------------|------------------|-------|------|-------------------|-------|-------------|
| chr18:18548732-18572898 | hsa_circ_0107993 | 24166 | 1118 | ENST00000399799.1 | ROCK1 | Rybak2015   |
| chr18:18539800-18564496 | hsa_circ_0047058 | 24696 | 1208 | NM_005406         | ROCK1 | Salzman2013 |
| chr18:18559870-18588155 | hsa_circ_0107996 | 28285 | 1244 | ENST00000399799.1 | ROCK1 | Rybak2015   |
| chr18:18586311-18624147 | hsa_circ_0108009 | 37836 | 1295 | ENST00000399799.1 | ROCK1 | Rybak2015   |
| chr18:18572791-18624147 | hsa_circ_0108005 | 51356 | 1402 | ENST00000399799.1 | ROCK1 | Rybak2015   |
| chr18:18546877-18572898 | hsa_circ_0107988 | 26021 | 1467 | ENST00000399799.1 | ROCK1 | Rybak2015   |
| chr18:18571136-18624147 | hsa_circ_0108004 | 53011 | 1553 | ENST00000399799.1 | ROCK1 | Rybak2015   |
| chr18:18539800-18572898 | hsa_circ_0107986 | 33098 | 1627 | ENST00000399799.1 | ROCK1 | Rybak2015   |
| chr18:18564311-18622196 | hsa_circ_0107999 | 57885 | 1669 | ENST00000399799.1 | ROCK1 | Rybak2015   |
| chr18:18546877-18622670 | hsa_circ_0107989 | 75793 | 2677 | ENST00000399799.1 | ROCK1 | Rybak2015   |
| chr18:18546877-18624147 | hsa_circ_0107990 | 77270 | 2762 | ENST00000399799.1 | ROCK1 | Rybak2015   |
| chr18:18539800-18625428 | hsa_circ_0047059 | 85628 | 3098 | NM_005406         | ROCK1 | Salzman2013 |
| chr18:18534743-18624147 | hsa_circ_0107985 | 89404 | 3263 | ENST00000399799.1 | ROCK1 | Rybak2015   |
| chr18:18529702-18625428 | hsa_circ_0047054 | 95726 | 5293 | NM_005406         | ROCK1 | Salzman2013 |

---

**Supplementary Table 2. Potential miRNAs that might be interacted with circROCK1-E3/E4 (hsa\_circ\_0108024) as predicted by circBank**

| <b>circBank ID</b> | <b>circbase ID</b> | <b>length</b> | <b>miRNA ID<br/>(miR_ID)</b> | <b>miRanda binding<br/>site (positions)</b> | <b>targetscan binding<br/>site (positions)</b> |
|--------------------|--------------------|---------------|------------------------------|---------------------------------------------|------------------------------------------------|
| hsa_circROCK1_003  | hsa_circ_0108024   | 239           | hsa-miR-548e-5p              | 164                                         | 179-185, 210-215                               |
| hsa_circROCK1_003  | hsa_circ_0108024   | 239           | hsa-miR-1298-5p              | 18                                          | 33-40                                          |
| hsa_circROCK1_003  | hsa_circ_0108024   | 239           | hsa-miR-138-1-3p             | 39                                          | 54-60                                          |
| hsa_circROCK1_003  | hsa_circ_0108024   | 239           | hsa-miR-204-5p               | 184                                         | 196-202                                        |
| hsa_circROCK1_003  | hsa_circ_0108024   | 239           | hsa-miR-29a-5p               | 4                                           | 19-26                                          |
| hsa_circROCK1_003  | hsa_circ_0108024   | 239           | hsa-miR-3144-3p              | 110                                         | 124-130                                        |
| hsa_circROCK1_003  | hsa_circ_0108024   | 239           | hsa-miR-3169                 | 210                                         | 221-227                                        |
| hsa_circROCK1_003  | hsa_circ_0108024   | 239           | hsa-miR-4633-5p              | 93                                          | 105-112                                        |
| hsa_circROCK1_003  | hsa_circ_0108024   | 239           | hsa-miR-4659b-3p             | 176                                         | 192-198                                        |
| hsa_circROCK1_003  | hsa_circ_0108024   | 239           | hsa-miR-4705                 | 54                                          | 66-72                                          |
| hsa_circROCK1_003  | hsa_circ_0108024   | 239           | hsa-miR-4724-3p              | 108                                         | 122-128                                        |
| hsa_circROCK1_003  | hsa_circ_0108024   | 239           | hsa-miR-515-5p               | 70                                          | 85-92                                          |
| hsa_circROCK1_003  | hsa_circ_0108024   | 239           | hsa-miR-532-5p               | 90                                          | 104-111                                        |
| hsa_circROCK1_003  | hsa_circ_0108024   | 239           | hsa-miR-548aj-5p             | 194                                         | 211-217                                        |
| hsa_circROCK1_003  | hsa_circ_0108024   | 239           | hsa-miR-548f-5p              | 197                                         | 211-217                                        |

|                   |                  |     |                 |     |         |
|-------------------|------------------|-----|-----------------|-----|---------|
| hsa_circROCK1_003 | hsa_circ_0108024 | 239 | hsa-miR-548g-5p | 194 | 211-217 |
| hsa_circROCK1_003 | hsa_circ_0108024 | 239 | hsa-miR-548x-5p | 194 | 211-217 |
| hsa_circROCK1_003 | hsa_circ_0108024 | 239 | hsa-miR-6834-3p | 187 | 199-205 |

**Supplementary Table 3. Potential miRNAs that might be interacted with circROCK1-E3/E4 (hsa\_circ\_0108024) as predicted by miRDB**

| Target Rank | Target Score | miRNA Name       | Gene Symbol      |
|-------------|--------------|------------------|------------------|
| 1           | 83           | hsa-miR-1298-5p  | hsa_circ_0108024 |
| 2           | 74           | hsa-miR-29a-5p   | hsa_circ_0108024 |
| 3           | 64           | hsa-miR-3165     | hsa_circ_0108024 |
| 4           | 60           | hsa-miR-519e-5p  | hsa_circ_0108024 |
| 5           | 60           | hsa-miR-515-5p   | hsa_circ_0108024 |
| 6           | 60           | hsa-miR-607      | hsa_circ_0108024 |
| 7           | 59           | hsa-miR-138-1-3p | hsa_circ_0108024 |
| 8           | 58           | hsa-miR-6814-5p  | hsa_circ_0108024 |
| 9           | 56           | hsa-miR-532-5p   | hsa_circ_0108024 |

|    |    |                 |                  |
|----|----|-----------------|------------------|
| 10 | 56 | hsa-miR-219b-5p | hsa_circ_0108024 |
| 11 | 53 | hsa-miR-216b-5p | hsa_circ_0108024 |
| 12 | 52 | hsa-miR-4456    | hsa_circ_0108024 |

---
